# Supplementary material for: Intravenous Injections of a Rationally Selected Oncolytic Herpes Virus as a Potent Virotherapy for Hepatocellular Carcinoma
Source: PubMed Central journal article supplement — Mol Ther Oncolytics. 2019 Oct 1;15:153–65. doi: 10.1016/j.omto.2019.09.004 (PMC6838930; doi:10.1016/j.omto.2019.09.004), 2019-10-01
Supplement: mmc1.pdf [file mmc1.pdf]

**OMTO, Volume 15**

**Supplemental Information**

**Intravenous Injections of a Rationally Selected**

**Oncolytic Herpes Virus as a Potent**

**Virotherapy for Hepatocellular Carcinoma**

**Yong Luo, Chaolong Lin, Wenfeng Ren, Fei Ju, Zilong Xu, Huiling Liu, Zeng Yu, Jun Chen, Jun Zhang, Pingguo Liu, Chenghao Huang, and Ningshao Xia**

**Figure S1**

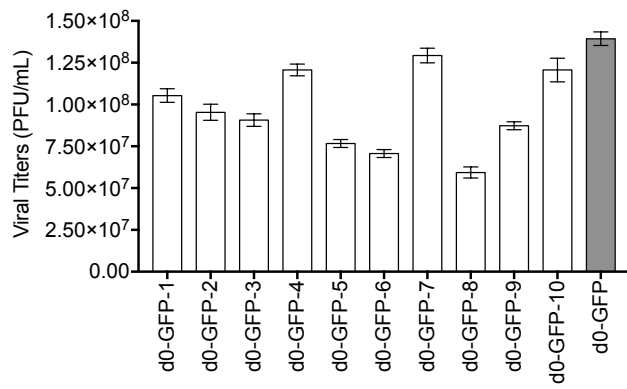

**Figure S1. Assessing viral replication efficiency of fusogenic d0-GFP progenies.** Viral titer was measured in various infected U-2 OS cell lines at 72 h after virus infection.

**Figure S2**

**Syncytial  
cytopathic effect**

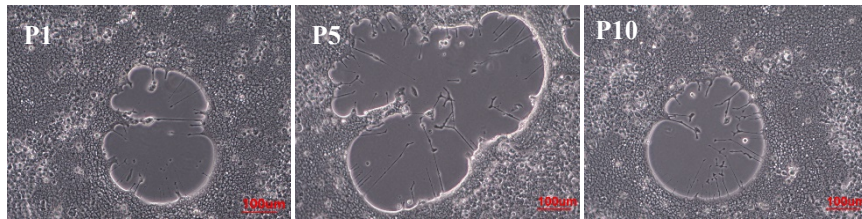

**Figure S2. Syncytial cytopathic effect of Ld0-GFP progenies.** Observation of Ld0-GFP plaque patterns were monitored at 48 h after virus infection (MOI=0.1 PFU/cell). P1 represents one time of passage, P5 represents five times of passage, P10 represents ten times of passage.

Figure S3

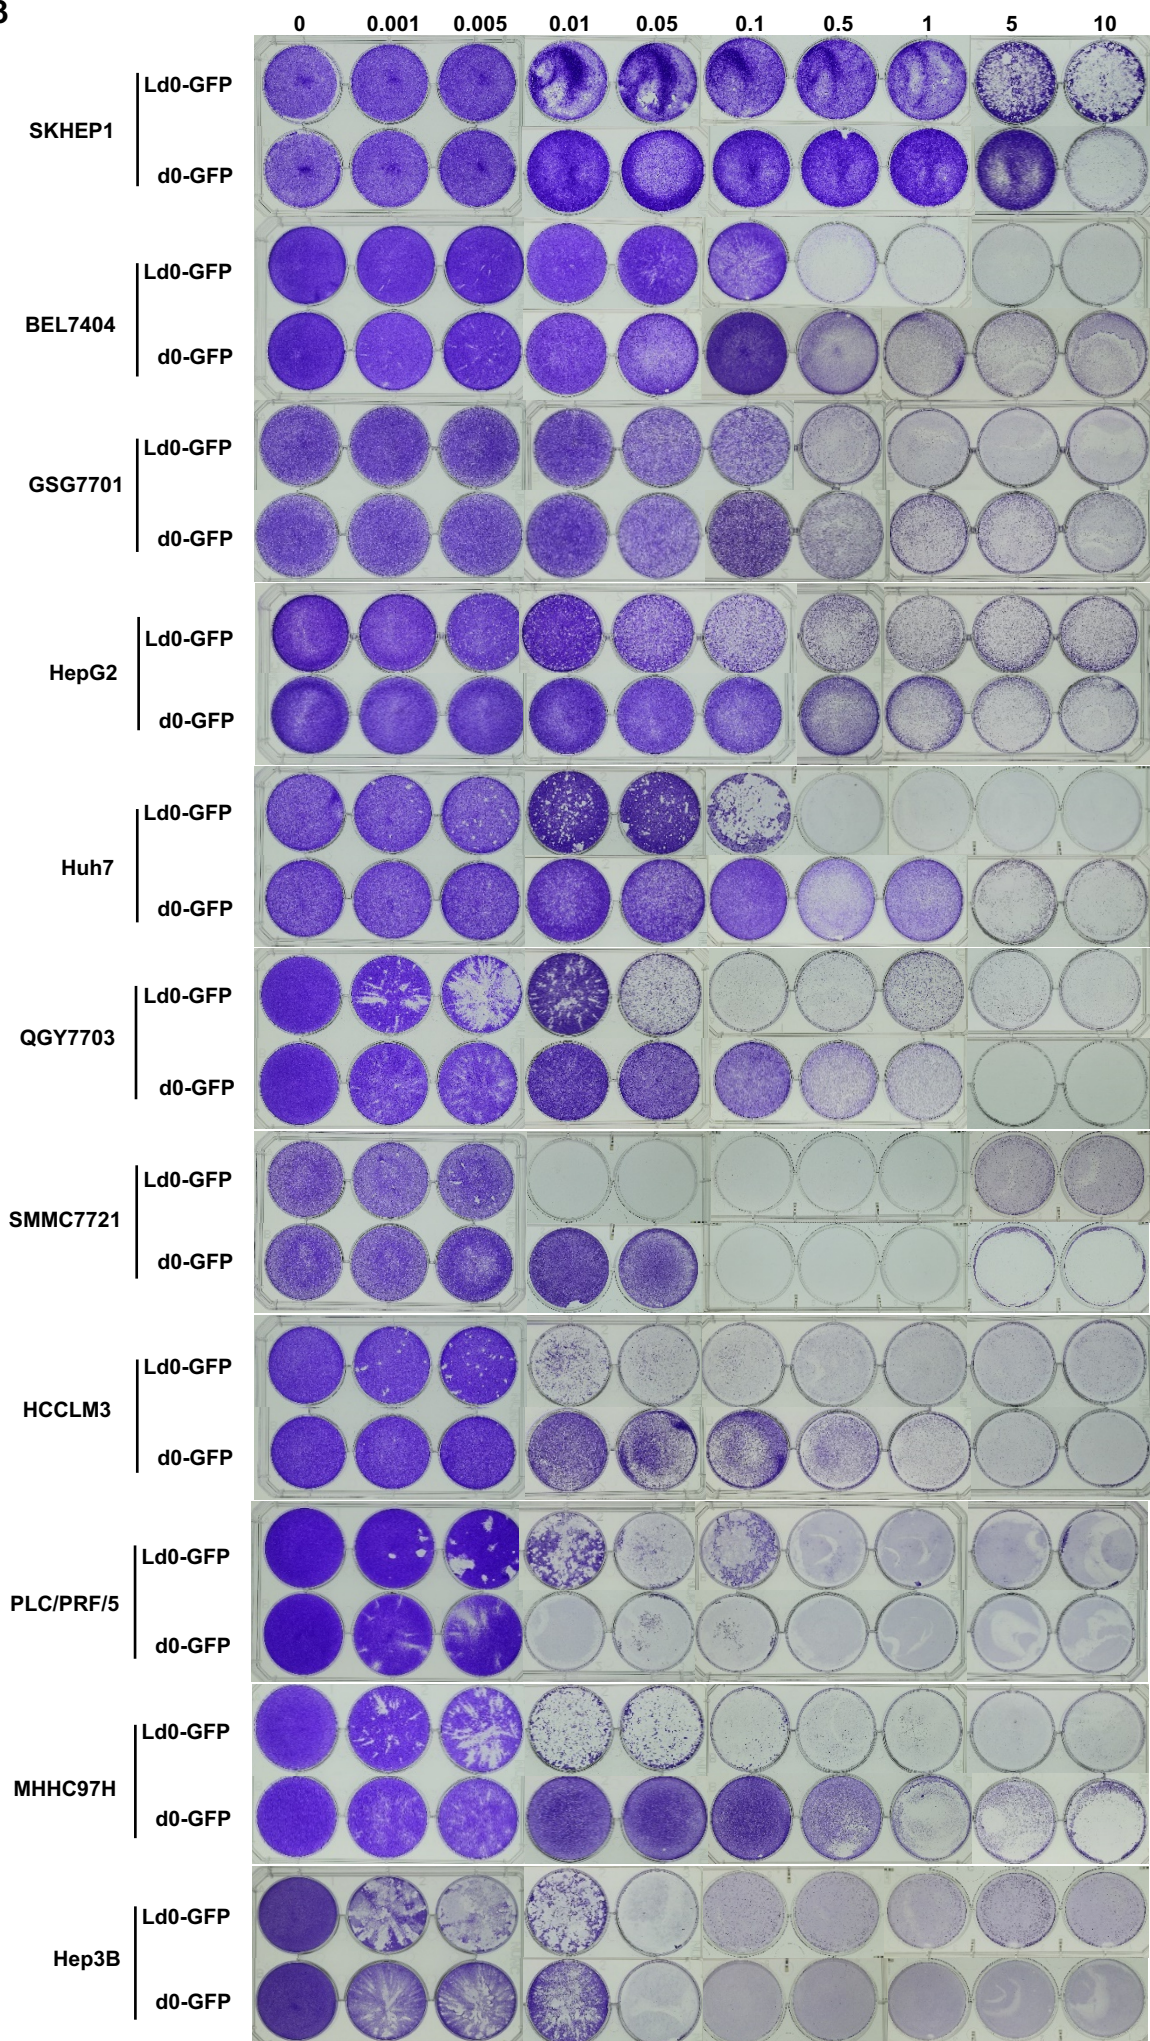

**Figure S3. Oncolytic ability of Ld0-GFP and d0-GFP against different HCC cell lines.**

Cell viability assays were performed on a panel of HCC cell lines on 72 h post Ld0-GFP or d0-GFP infection (MOI=0.001~10 PFU/cell), respectively. Crystal violet staining was used to determine the remaining HCC cells after oncolysis.

Figure S4

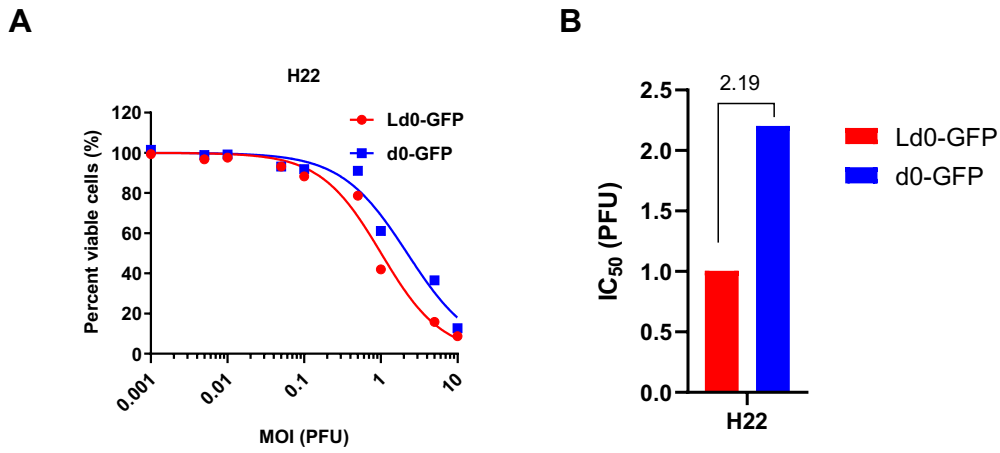

**Figure S4. Oncolytic ability of Ld0-GFP and d0-GFP against murine H22 cell lines.** (A) Cell viability assays were performed on murine H22 cell lines on 72 h post Ld0-GFP or d0-GFP infection (MOI=0.001~10 PFU/cell). (B) IC<sub>50</sub> was calculated in various infected murine H22 cell lines.

Figure S5

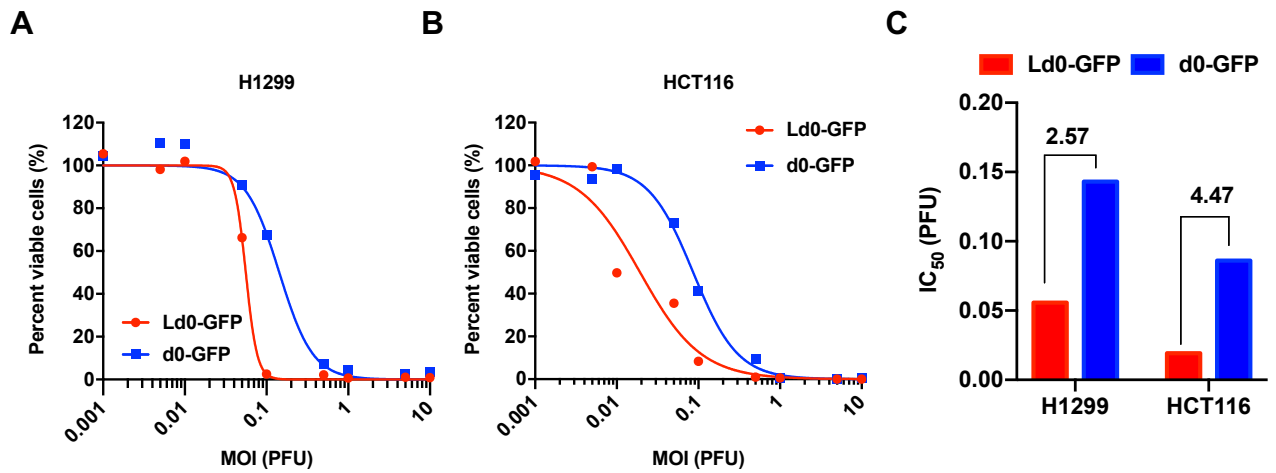

**Figure S5. Oncolytic ability of Ld0-GFP and d0-GFP against non-HCC cell lines.** (A) Cell viability assays were performed on the HCT116 and H1299 cell lines on 72 h post Ld0-GFP or d0-GFP infection (MOI=0.001~10 PFU/cell), respectively. (B) IC<sub>50</sub> was calculated in various infected cancer cell lines.

## Figure S6

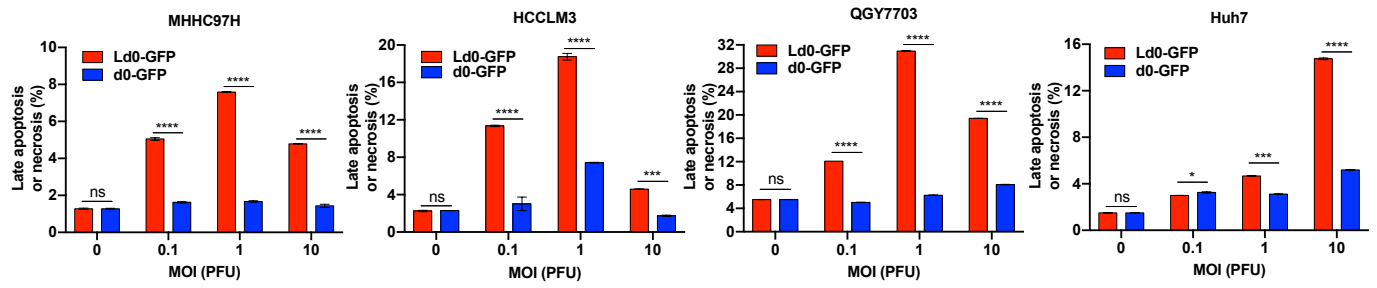

### Figure S6. Ld0-GFP can induce stronger late apoptosis or necrosis in HCC cell lines. (A)

Determination of levels of late apoptosis or necrosis in four HCC cell lines left uninfected or infected with Ld0-GFP or d0-GFP at MOIs of 0.1, 1 and 10 PFU/cell for 24 h by using annexin-V/PI-labeled flow cytometry.



**Table S1. Amino acid sequence variation of Ld0-GFP relative to d0-GFP**

| ORF  | Protein name | Function of gene product                                                        | Amino acid substitution | Possible impact of amino acid substitution on virus phenotype               |
|------|--------------|---------------------------------------------------------------------------------|-------------------------|-----------------------------------------------------------------------------|
| UL9  | UL9          | Helicases; Required for HSV-1 DNA replication                                   | A797P                   | Unknown                                                                     |
| UL12 | NUC          | Alkaline nuclease; essential for viral replication.                             | A467T                   | Unknown                                                                     |
| UL13 | VPK          | Virion (nuclear) protein kinase; substrates include ICP0, ICP22, etc.           | D376E                   | Unknown                                                                     |
| UL27 | gB           | Associate with membrane fusion.                                                 | E816D                   | Causes extensive virus-induced cell fusion.                                 |
| UL53 | gK           | Glycoprotein required for efficient viral exocytosis; contains Syncytial-locus. | A40V                    | Display a reduced ability to block cell-cell fusion and endow fusogenicity. |

The amino acids of all ORF in the virus genome were compared between d0-GFP and Ld0-GFP. Five genes, including UL53 (gK), UL27 (gB), UL9, UL12 (NUC) and UL13 (VPK), had amino acid changes unique to Ld0-GFP.
